# Supplementary material for: Serinol-Based Versatile Disulfide-Reducing Reagent
Source: MDPI journal article supplement (doi:10.3390/molecules28145489), 2023-07-18
Supplement: s1 [file s1]

# Serinol-Based Versatile Disulfide-Reducing Reagent <sup>†</sup>

Babita Kushwaha <sup>1</sup>, Sinenhlanhla N. Mthembu <sup>1,2</sup>, Anamika Sharma <sup>1,2,3</sup>, Fernando Albericio <sup>2,4,\*</sup> and Beatriz G. de la Torre <sup>1,\*</sup>

<sup>1</sup> KwaZulu-Natal Research Innovation and Sequencing Platform (KRISP), School of Laboratory Medicine and Medical Sciences, College of Health Sciences, University of KwaZulu-Natal, Durban 4041, South Africa

<sup>2</sup> Peptide Science Laboratory, School of Chemistry and Physics, University of KwaZulu-Natal, Durban 4000, South Africa

<sup>3</sup> Department of Natural Products and Medicinal Chemistry, CSIR-Indian Institute of Chemical Technology, Hyderabad 500007, India

<sup>4</sup> CIBER-BBN, Networking Centre on Bioengineering, Biomaterials and Nanomedicine, Department of Organic Chemistry, University of Barcelona, 08028 Barcelona, Spain

\* Correspondence: albericio@ukzn.ac.za (F.A.); garciadelatorreb@ukzn.ac.za (B.G.d.l.T.)

<sup>†</sup> Honoring the Nobel Laureate in Chemistry Professor Morten Meldal, who is a continuous inspiration for all of us.

## Supporting information

### Table of contents

| Sl. No. | Contents                                                                                                               | Page No. |
|---------|------------------------------------------------------------------------------------------------------------------------|----------|
| 1.      | Copies of <sup>1</sup> H, <sup>13</sup> C, HPLC and Mass spectra of synthesized compounds.....                         | S2       |
| 2.      | Stability test of DPDT in solid form. (A) freshly prepared; (B) after 60 days..                                        | S18      |
| 3.      | Stability test of DMPDT in solid form. (A) freshly prepared; (B) after 60 days.                                        | S19      |
| 4.      | HPLC chromatogram of Fmoc-Cys(SDMP)-OH with DTT (1:1 and 1:2 ratio) with 2.5% DIEA and 2.5% water at 0 min.....        | S20      |
| 5.      | Effect of different bases in reduction of Fmoc-Cys(S-DMP)-OH using DPDT in ACN/base/H <sub>2</sub> O (95:2.5:2.5)..... | S21      |
| 6.      | Fmoc-Ala-Cys(SIT)-Leu-NH-resin after treatment with DTT with 2.5% DIEA and 2.5% water in DMF.....                      | S22      |

1. Copies of  $^1\text{H}$ ,  $^{13}\text{C}$ , HPLC and Mass spectra of synthesized compounds

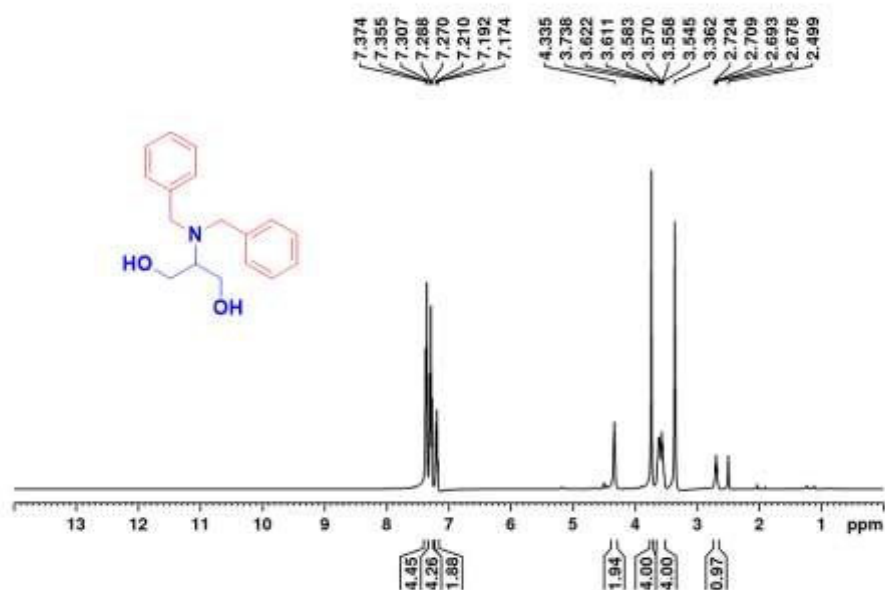

Figure S1:  $^1\text{H}$  NMR of Compound 3a (400 MHz,  $\text{DMSO}-d_6$ )

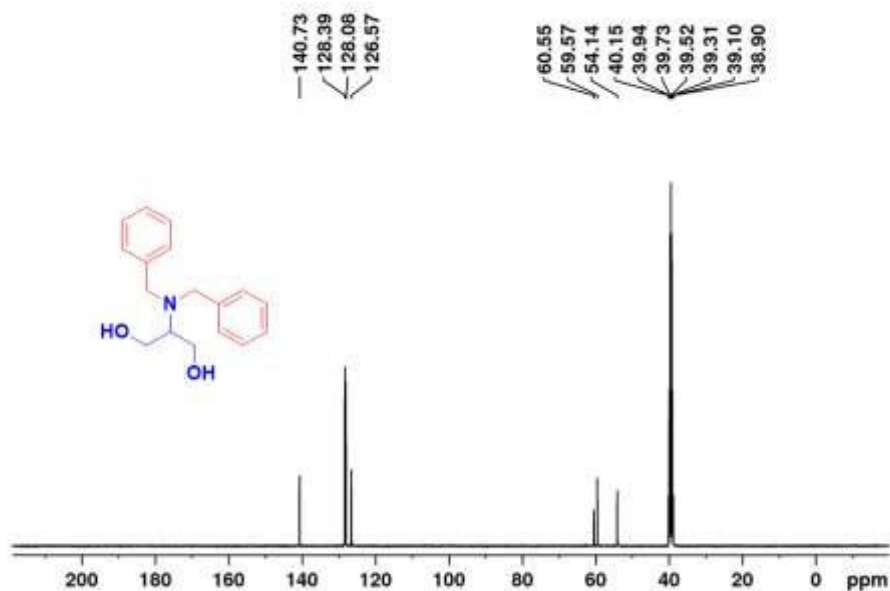

Figure S2:  $^{13}\text{C}$  NMR of Compound 3a (100 MHz,  $\text{DMSO}-d_6$ )

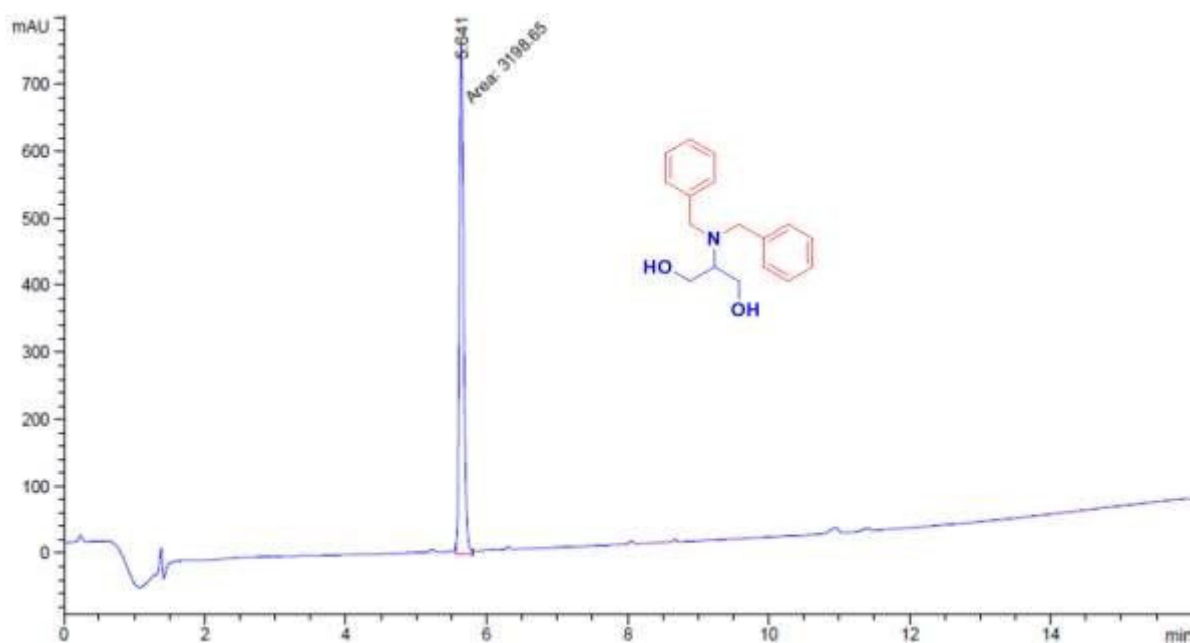

Figure S3: HPLC of Compound 3a

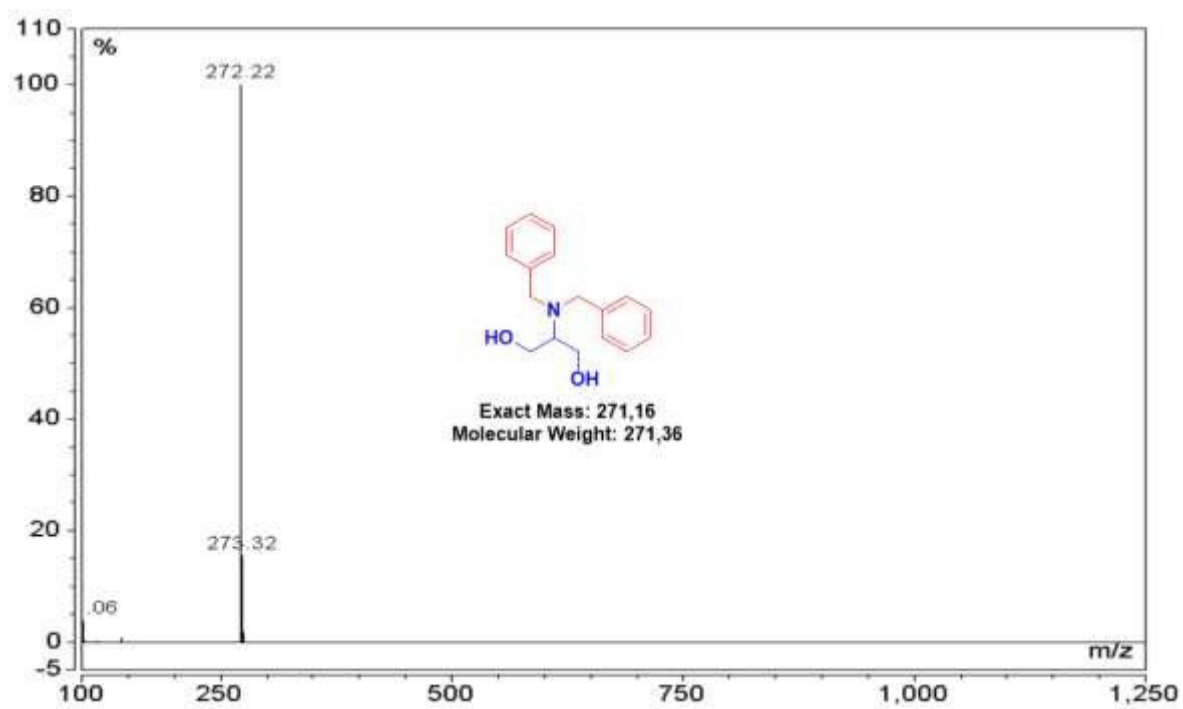

Figure S4: Mass of Compound 3a

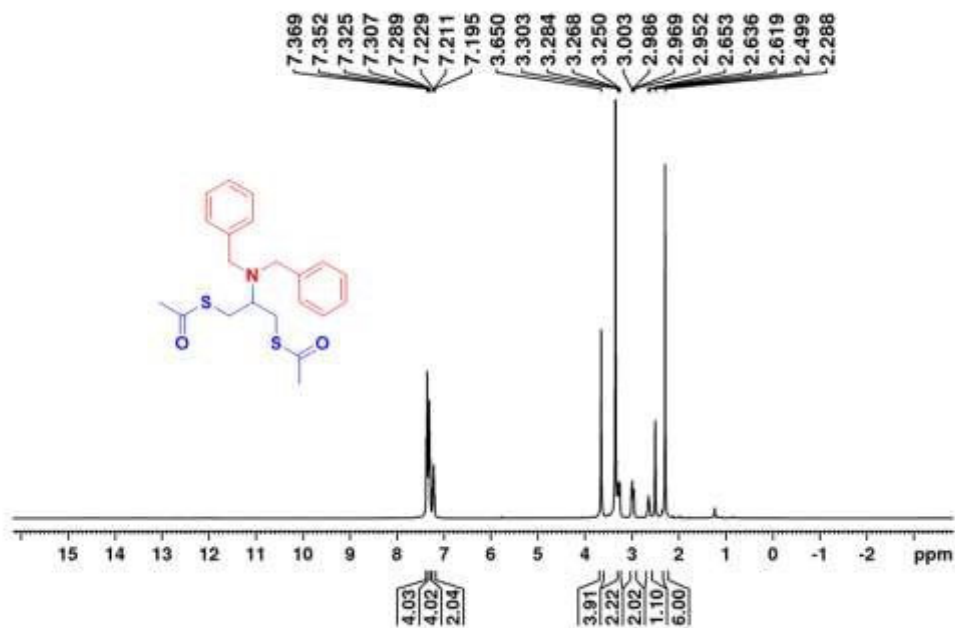

Figure S5: <sup>1</sup>H NMR of Compound 4a (400 MHz, DMSO-*d*<sub>6</sub>)

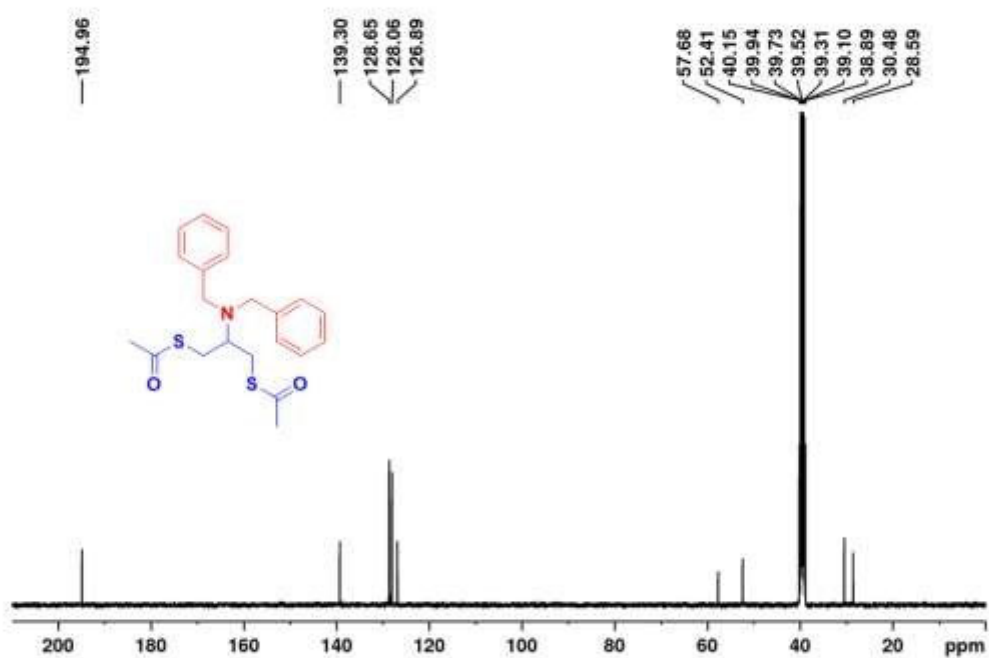

Figure S6: <sup>13</sup>C NMR of Compound 4a (100 MHz, DMSO-*d*<sub>6</sub>)

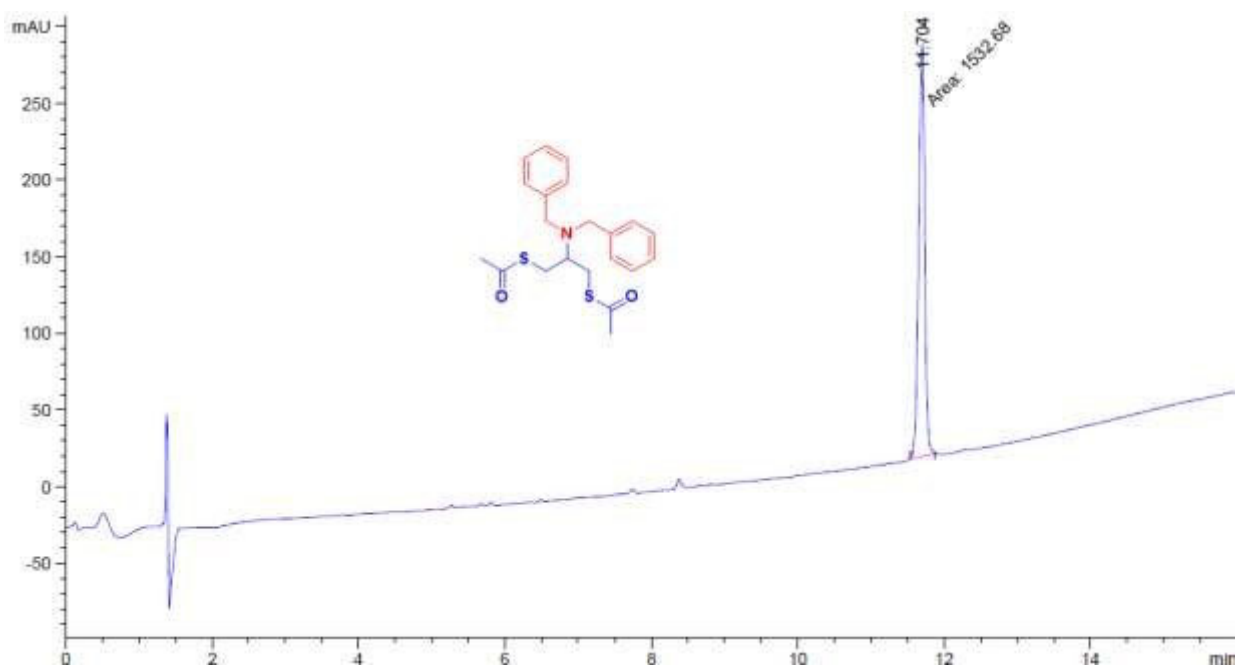

Figure S7: HPLC of Compound 4a

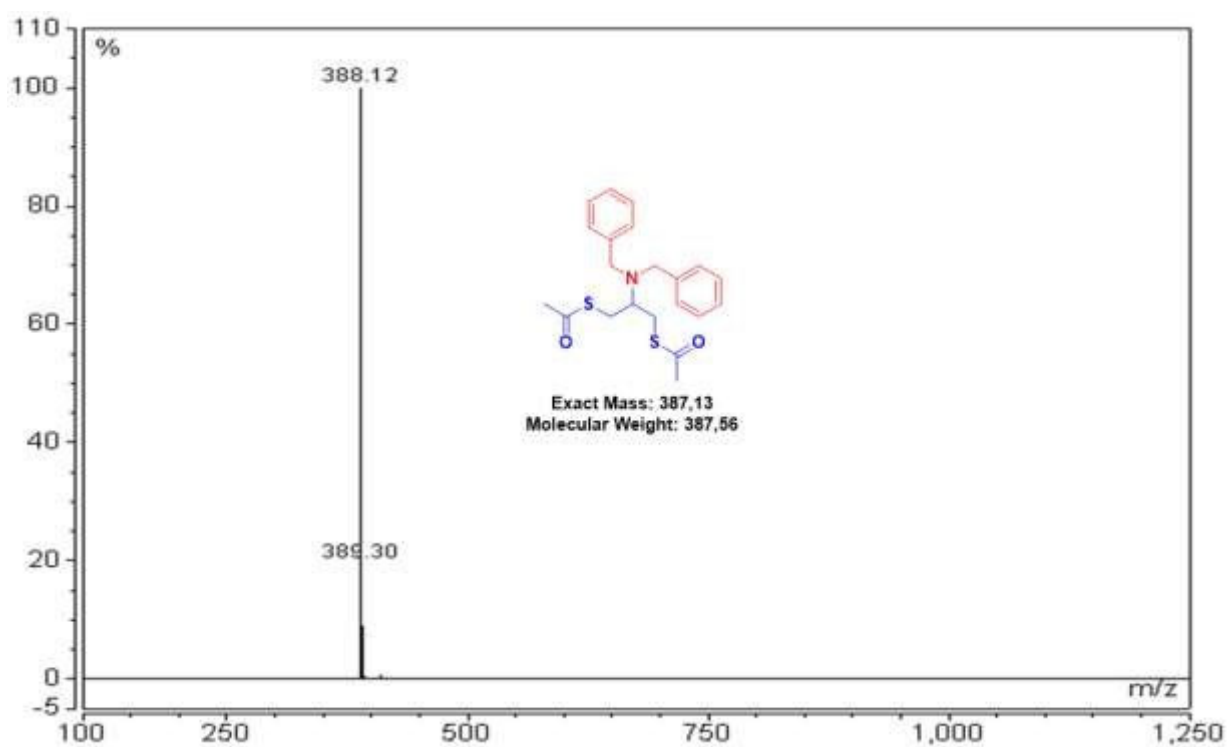

Figure S8: Mass of Compound 4a

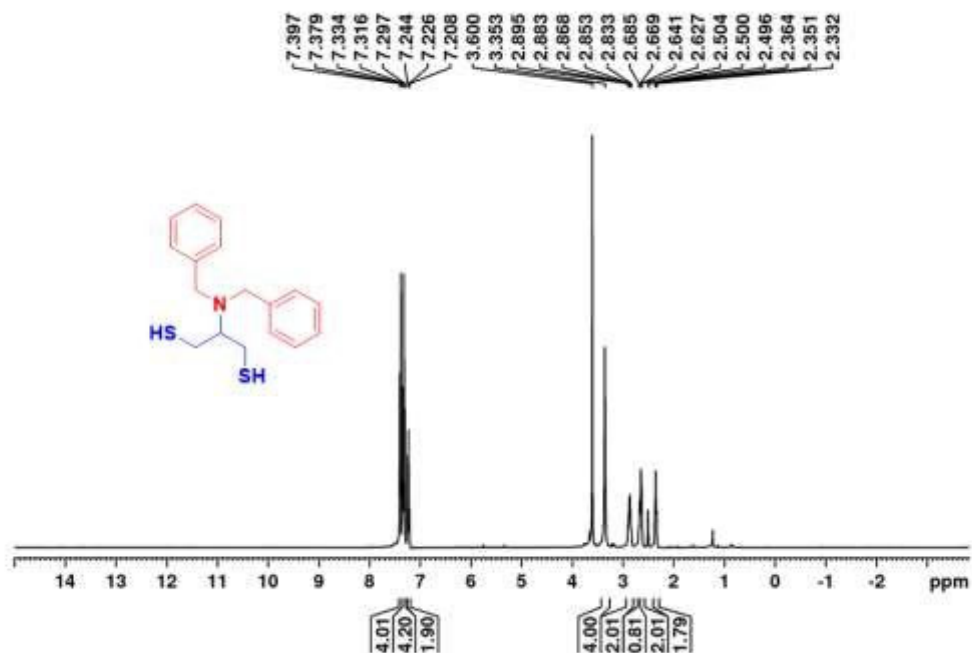

Figure S9: <sup>1</sup>H NMR of Compound 1a (DPDT) (400 MHz, DMSO-*d*<sub>6</sub>)

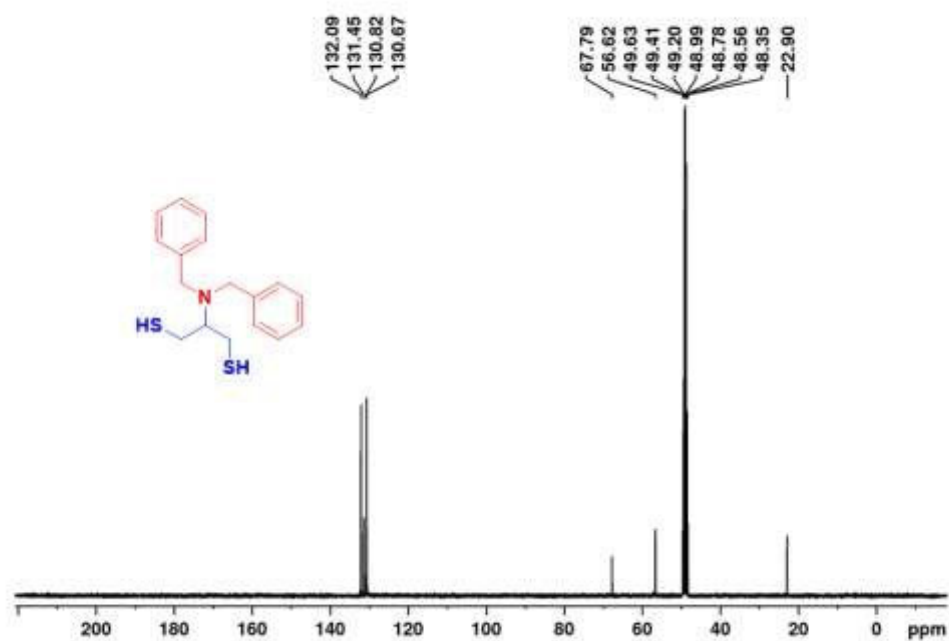

Figure S10: <sup>13</sup>C NMR of Compound 1a (DPDT) (100 MHz, MeOD-*d*<sub>4</sub>)

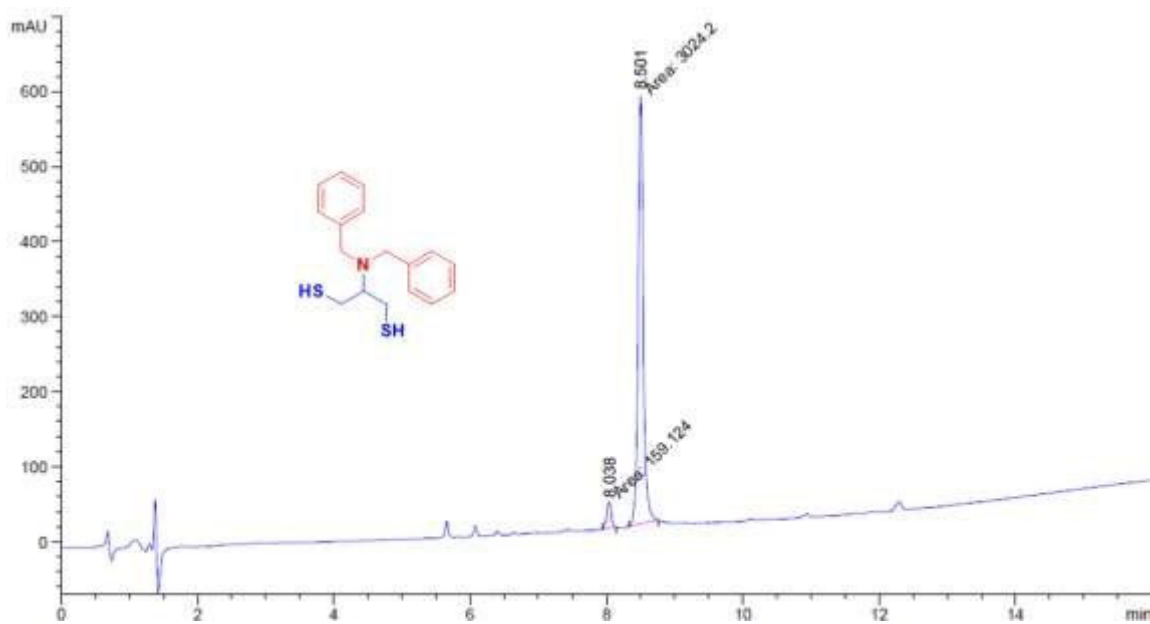

Figure S11: HPLC of Compound 1a (DPDT)

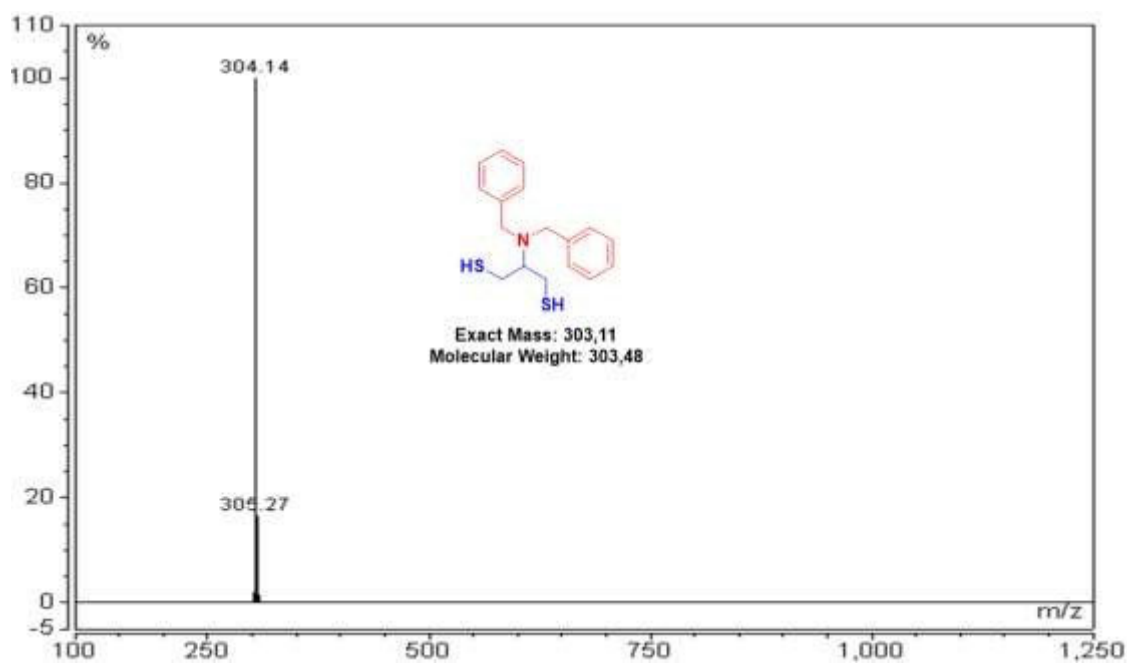

Figure S12: Mass of Compound 1a (DPDT)

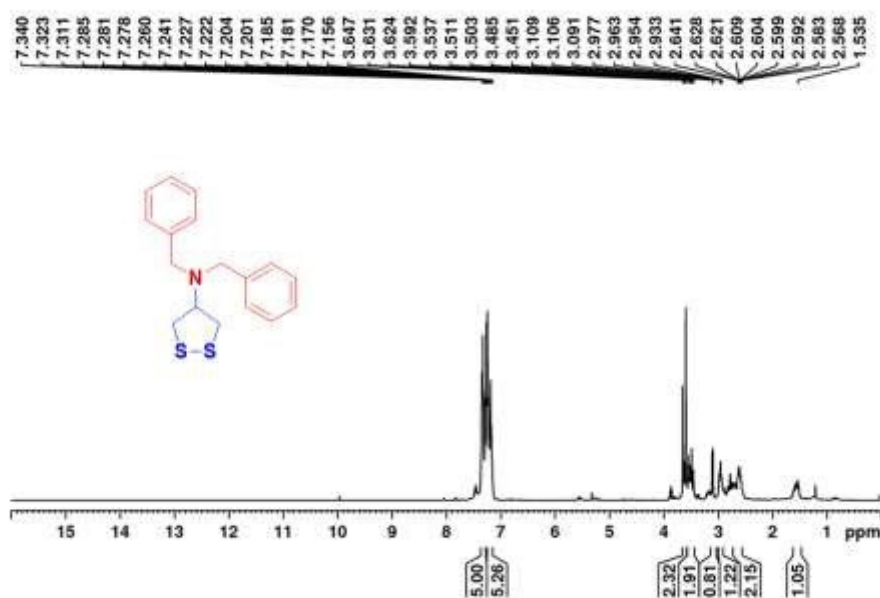

Figure S13: <sup>1</sup>H NMR of Compound 1a<sup>OX</sup> (DPDT<sup>OX</sup>) (400 MHz, CDCl<sub>3</sub>)

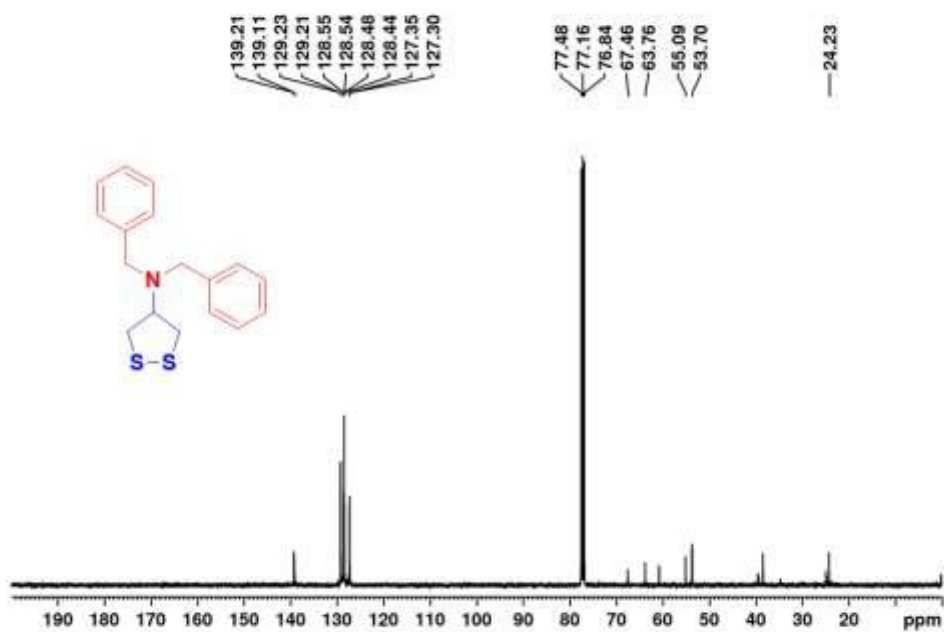

Figure S14: <sup>13</sup>C NMR of Compound 1a<sup>OX</sup> (DPDT<sup>OX</sup>) (100 MHz, CDCl<sub>3</sub>)



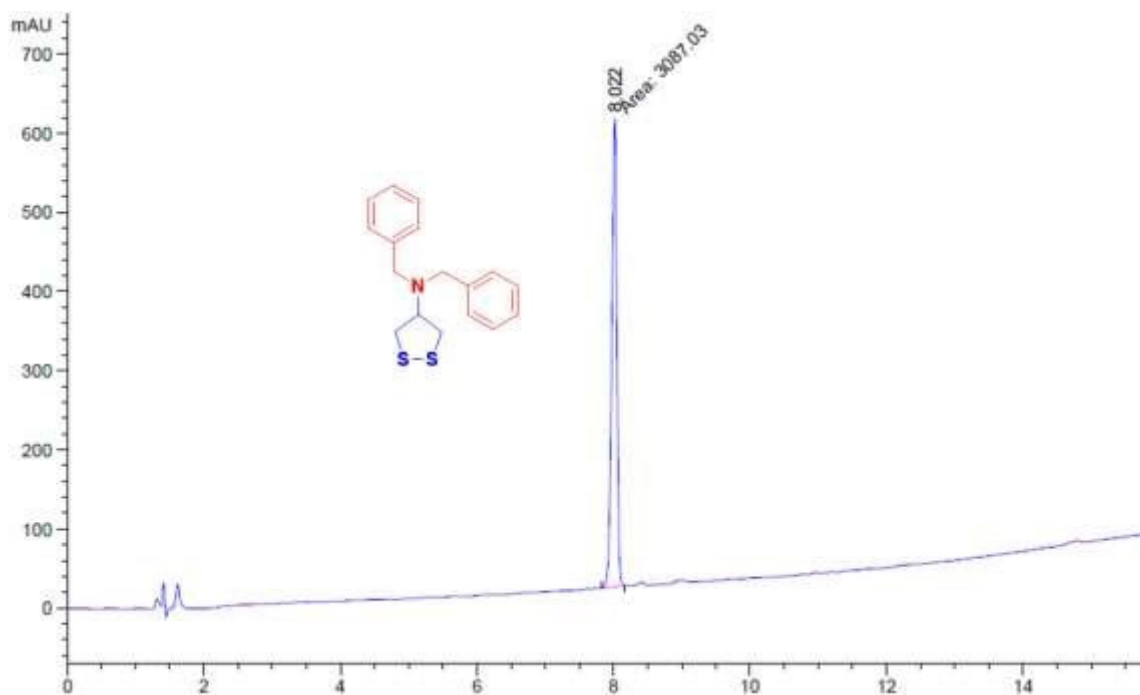

Figure S15: HPLC of Compound 1a<sup>OX</sup> (DPDT<sup>OX</sup>)

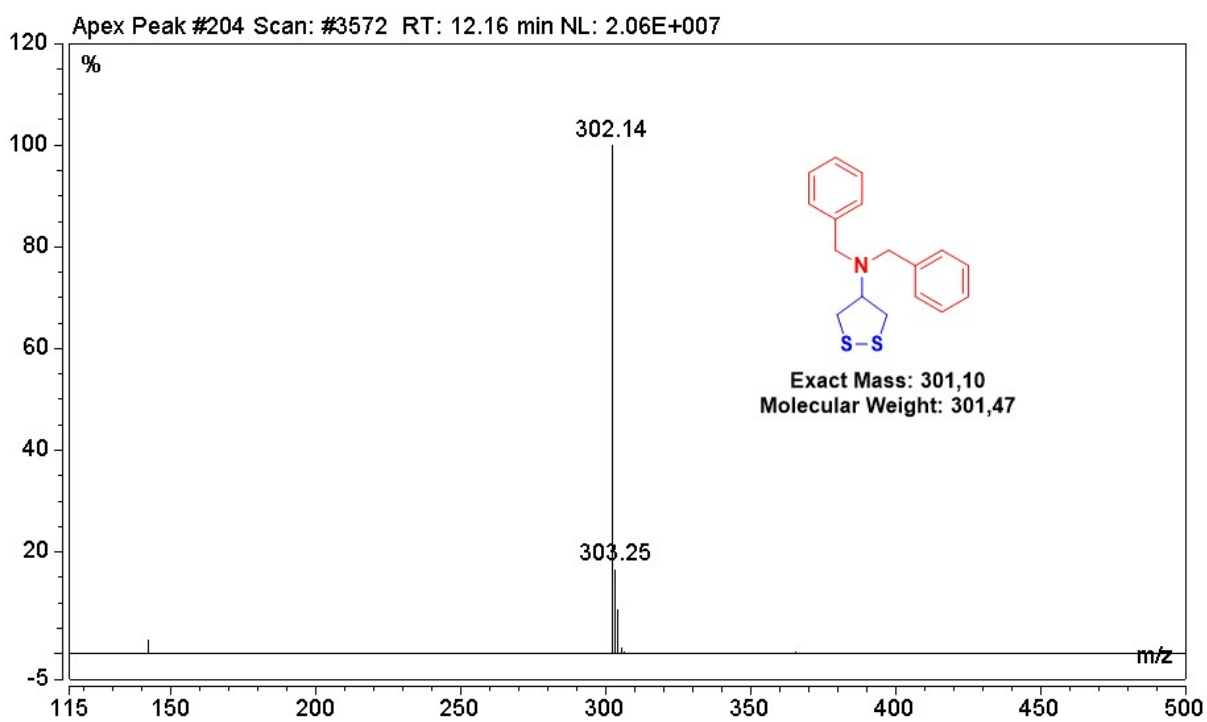

Figure S16: Mass of Compound 1a<sup>OX</sup> (DPDT<sup>OX</sup>)

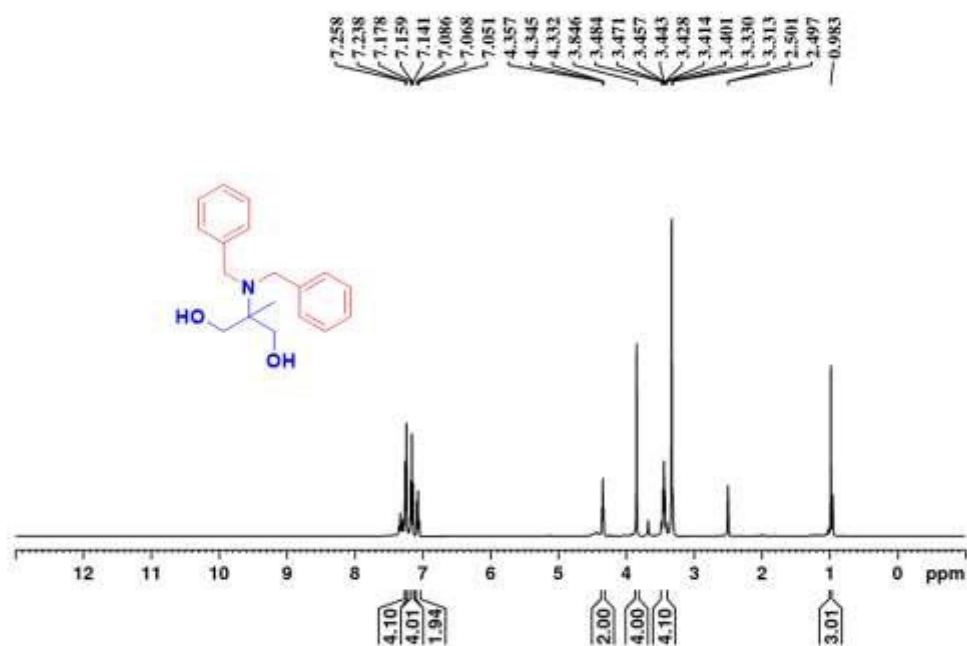

Figure S17: <sup>1</sup>H NMR of Compound 3b (400 MHz, DMSO-*d*<sub>6</sub>)

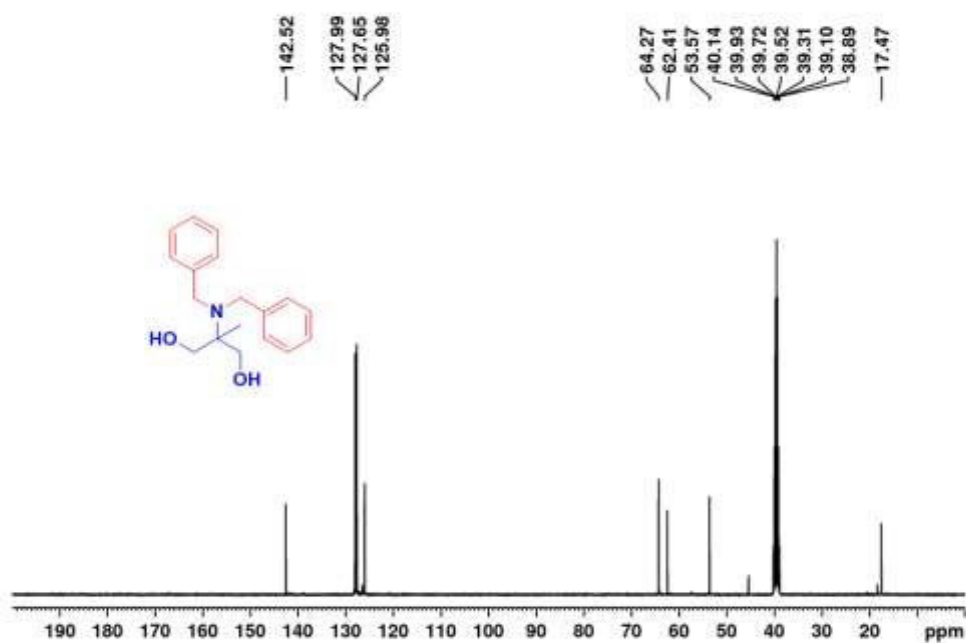

Figure S18: <sup>13</sup>C NMR of Compound 3b (100 MHz, DMSO-*d*<sub>6</sub>)

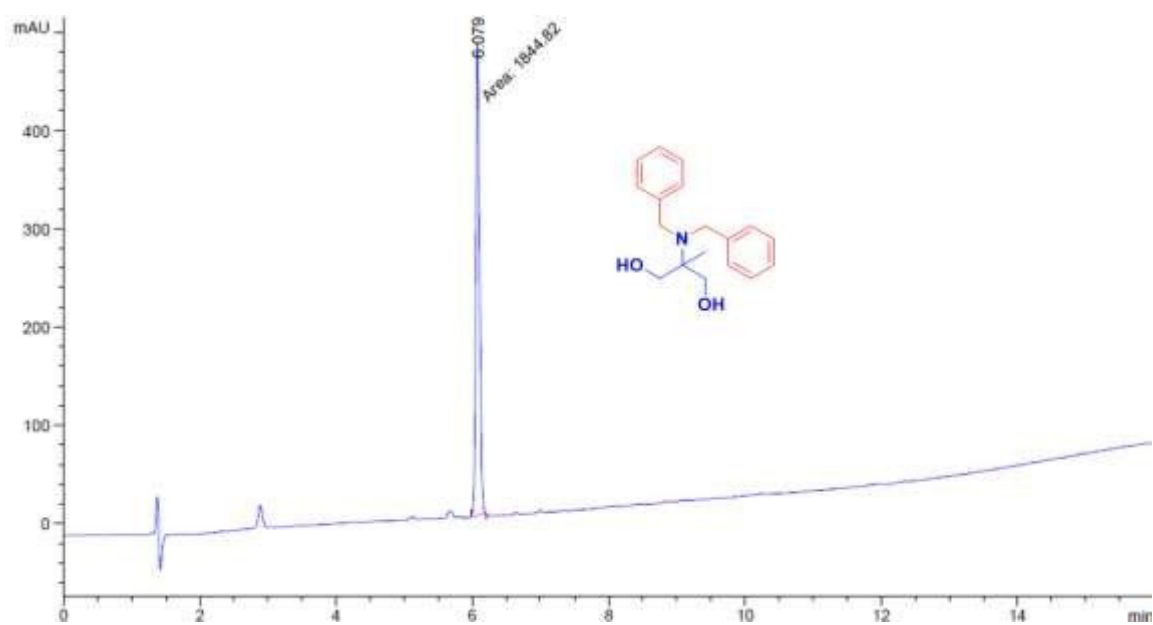

Figure S19: HPLC of Compound 3b

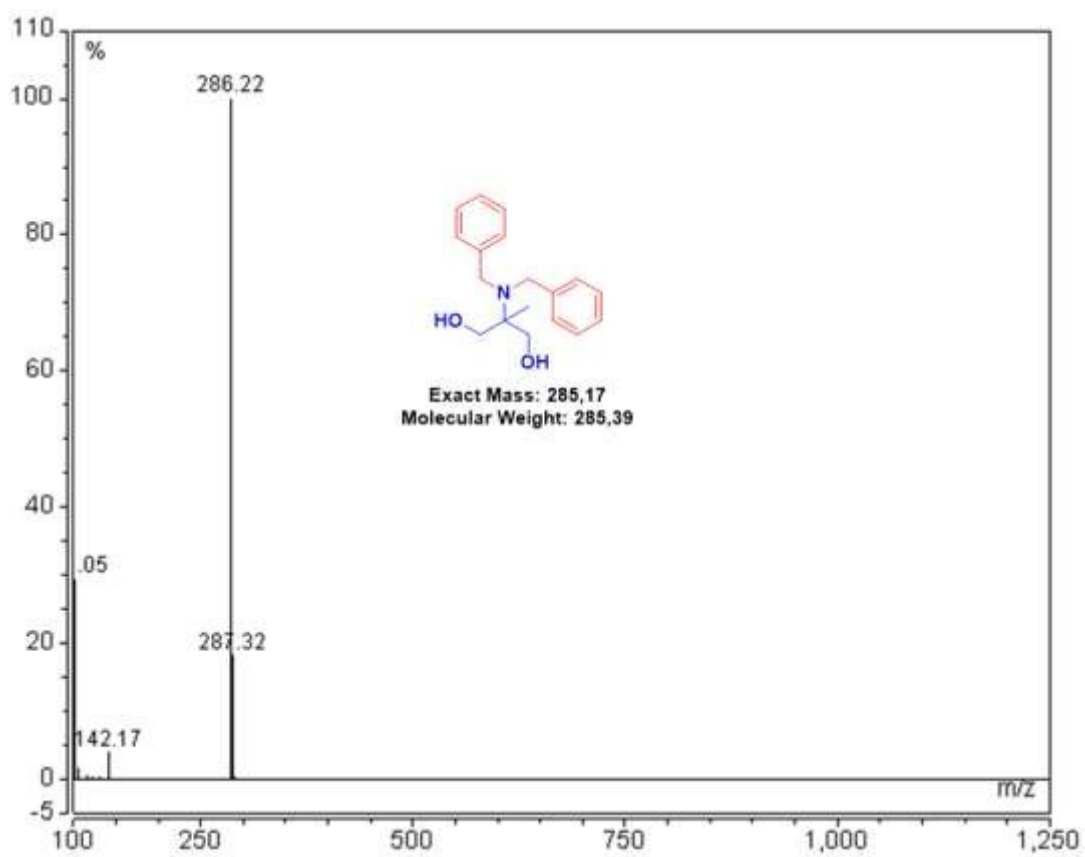

Figure S20: Mass of Compound 3b

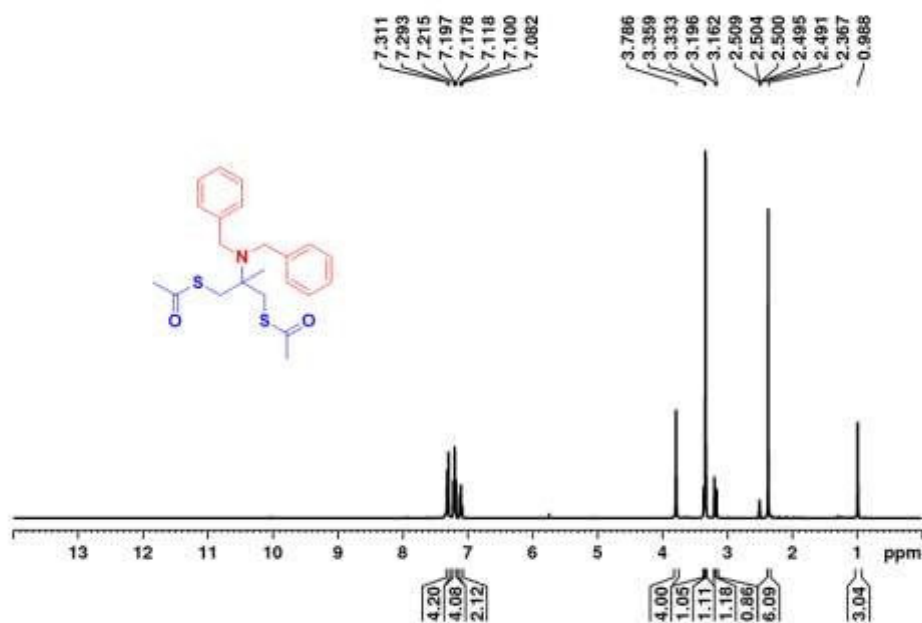

Figure S21: <sup>1</sup>H NMR of Compound 4b (400 MHz, DMSO-*d*<sub>6</sub>)

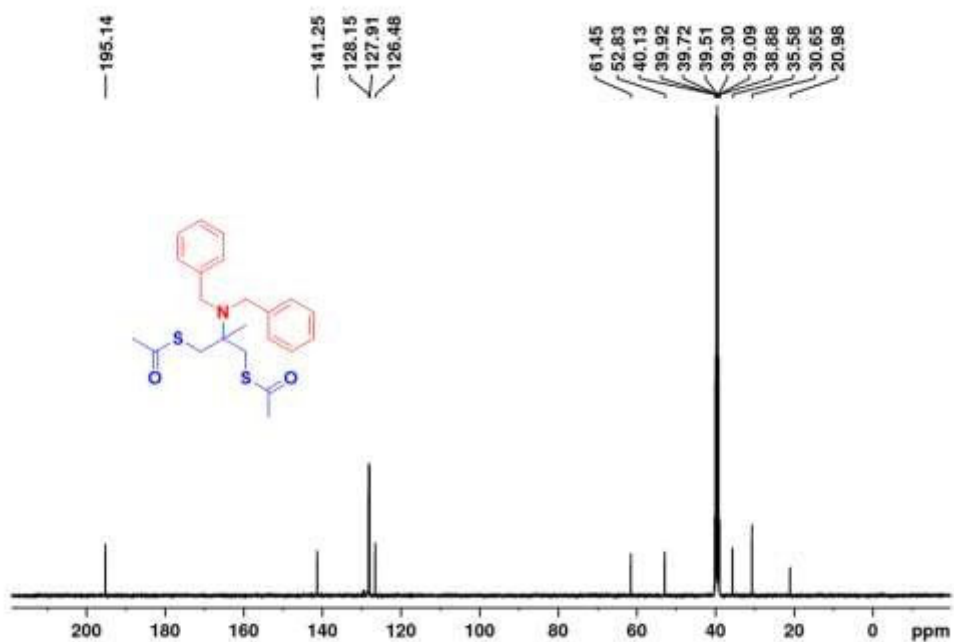

Figure S22: <sup>13</sup>C NMR of Compound 4b (100 MHz, DMSO-*d*<sub>6</sub>)

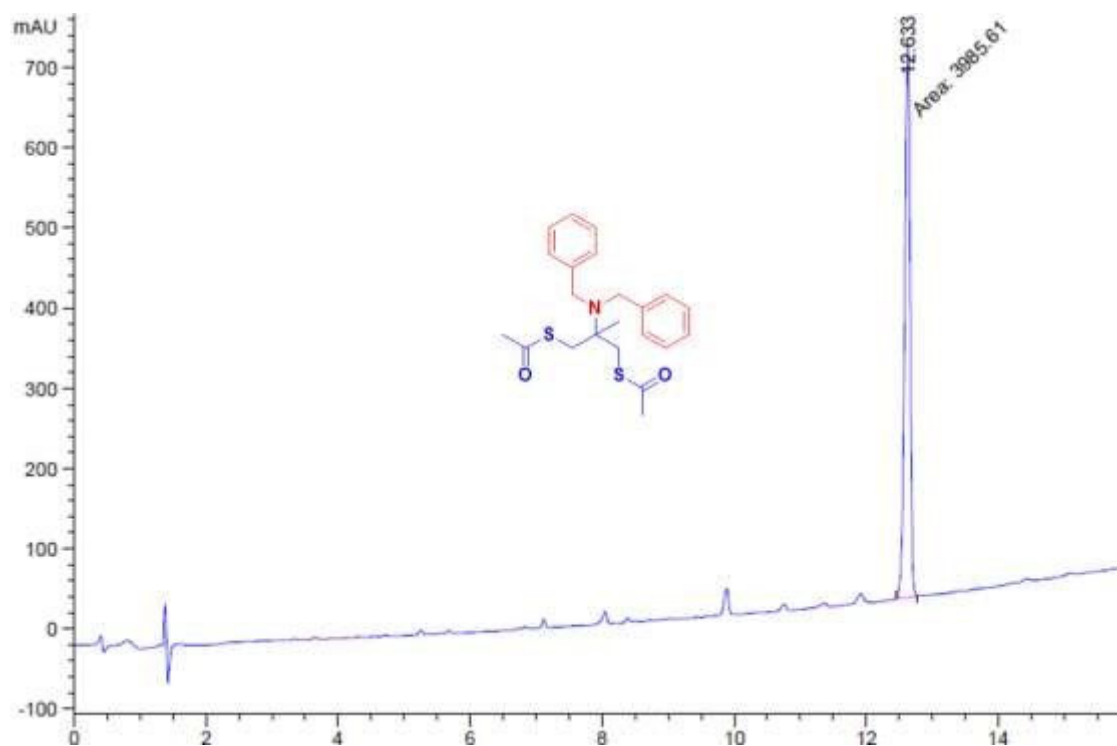

Figure S23: HPLC of Compound 4b

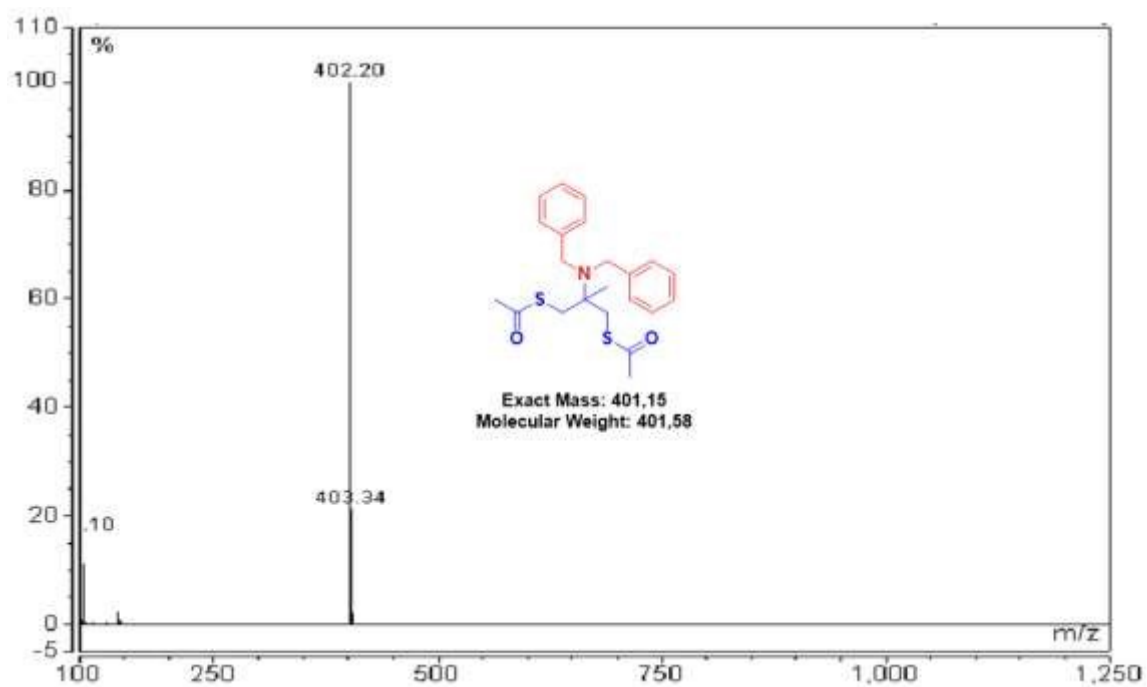

Figure S24: Mass of Compound 4b

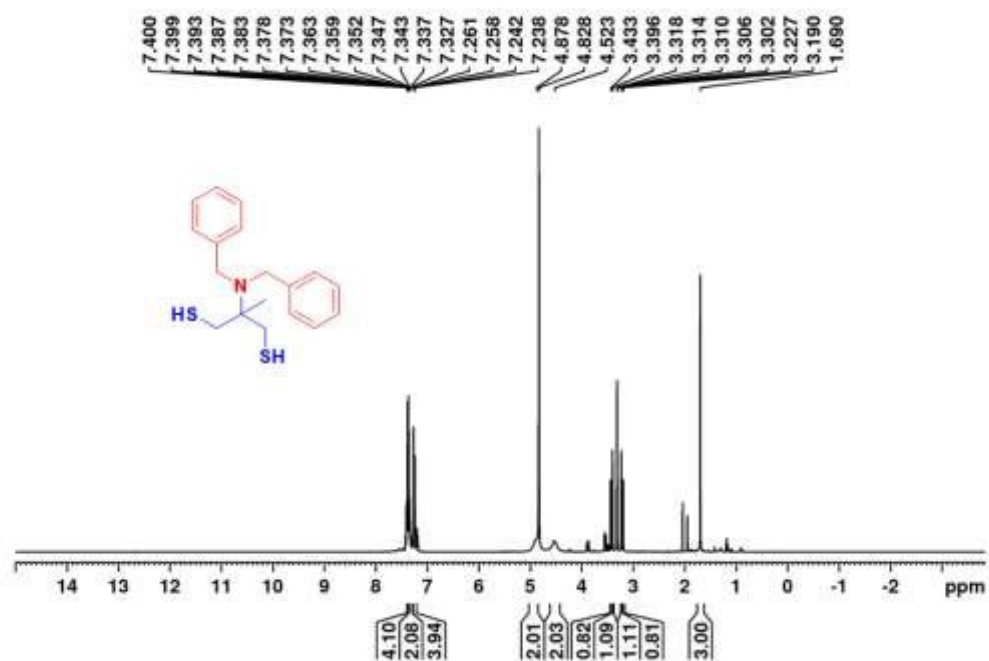

Figure S25: <sup>1</sup>H NMR of Compound 1b (DMPDT) (400 MHz, MeOD-*d*<sub>4</sub>)

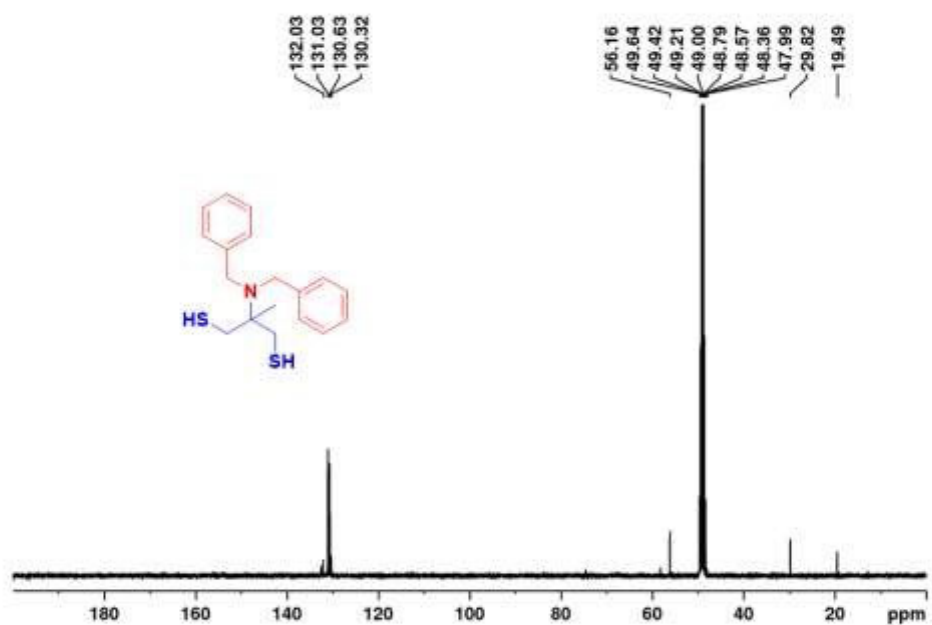

Figure S26: <sup>13</sup>C NMR of Compound 1b (DMPDT) (100 MHz, MeOD-*d*<sub>4</sub>)

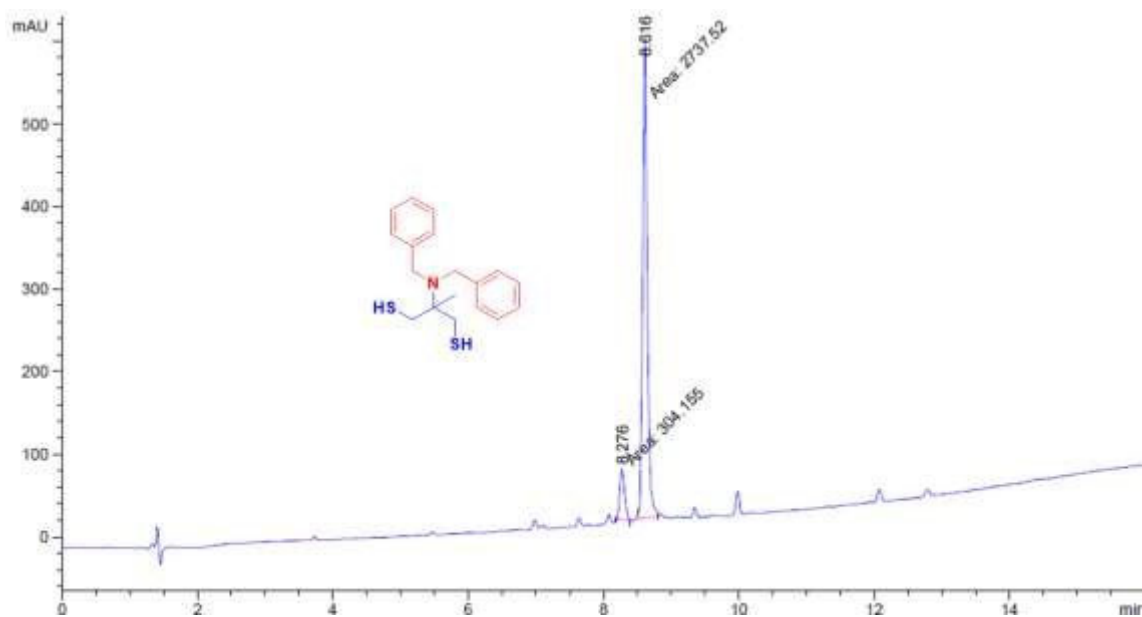

Figure S27: HPLC of Compound 1b (DMPDT)

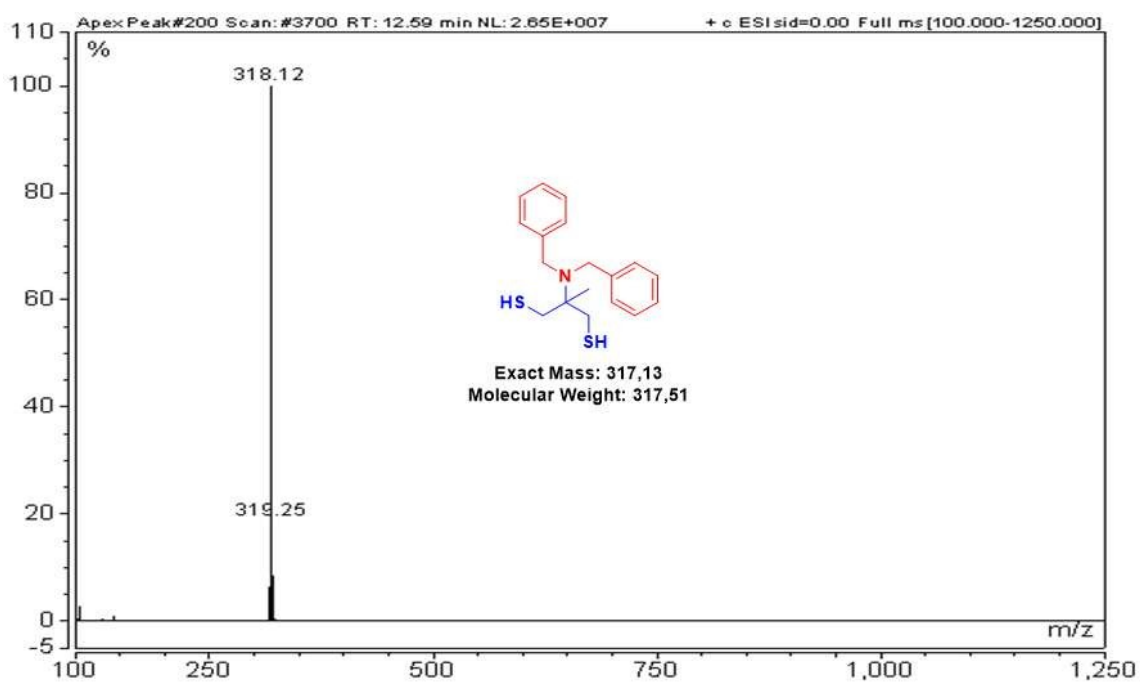

Figure S28: Mass of Compound 1b (DMPDT)

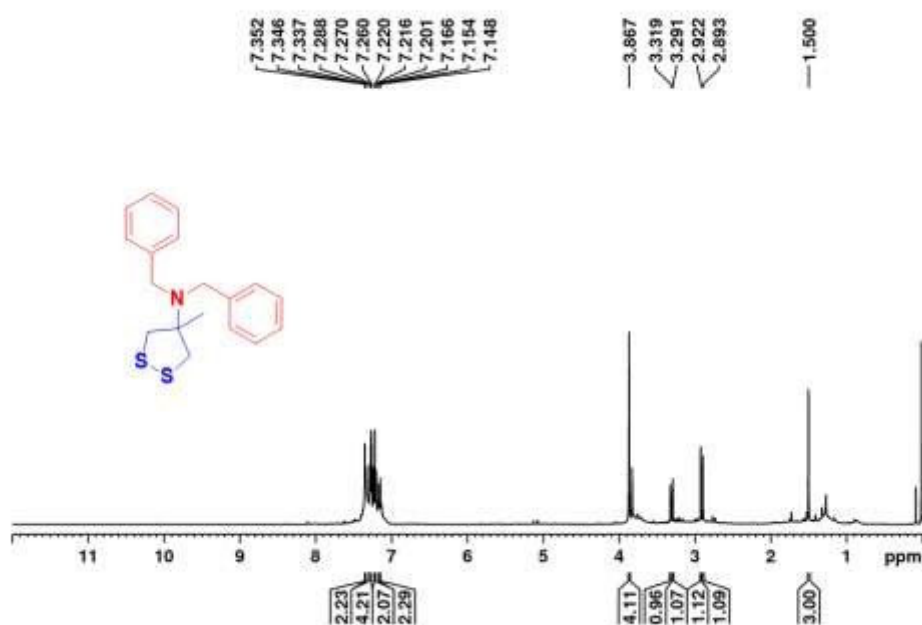

Figure S29: <sup>1</sup>H NMR of Compound 1b<sup>OX</sup> (DMPDT<sup>OX</sup>) (400 MHz, CDCl<sub>3</sub>)

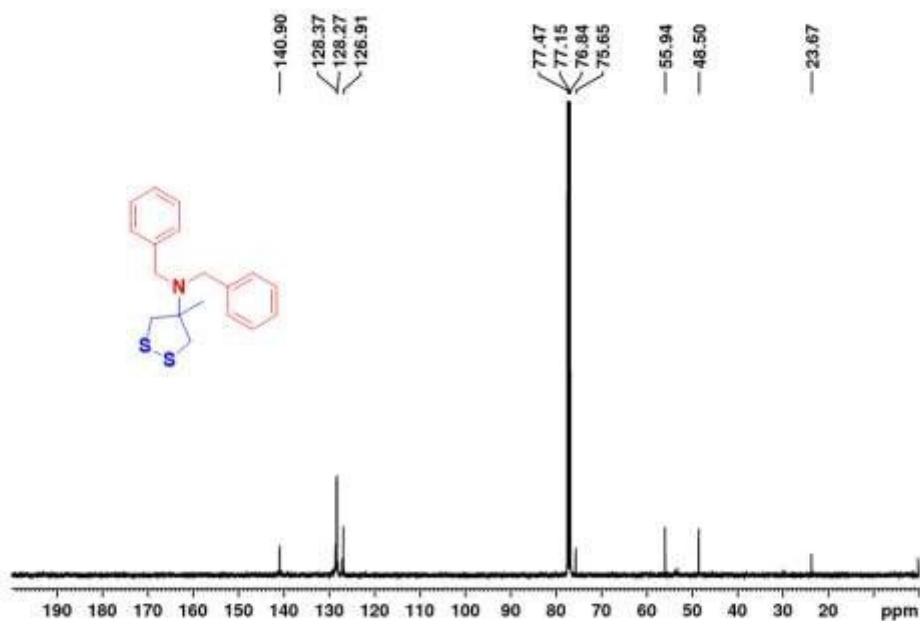

Figure S30: <sup>13</sup>C NMR of Compound 1b<sup>OX</sup> (DMPDT<sup>OX</sup>) (100 MHz, CDCl<sub>3</sub>)



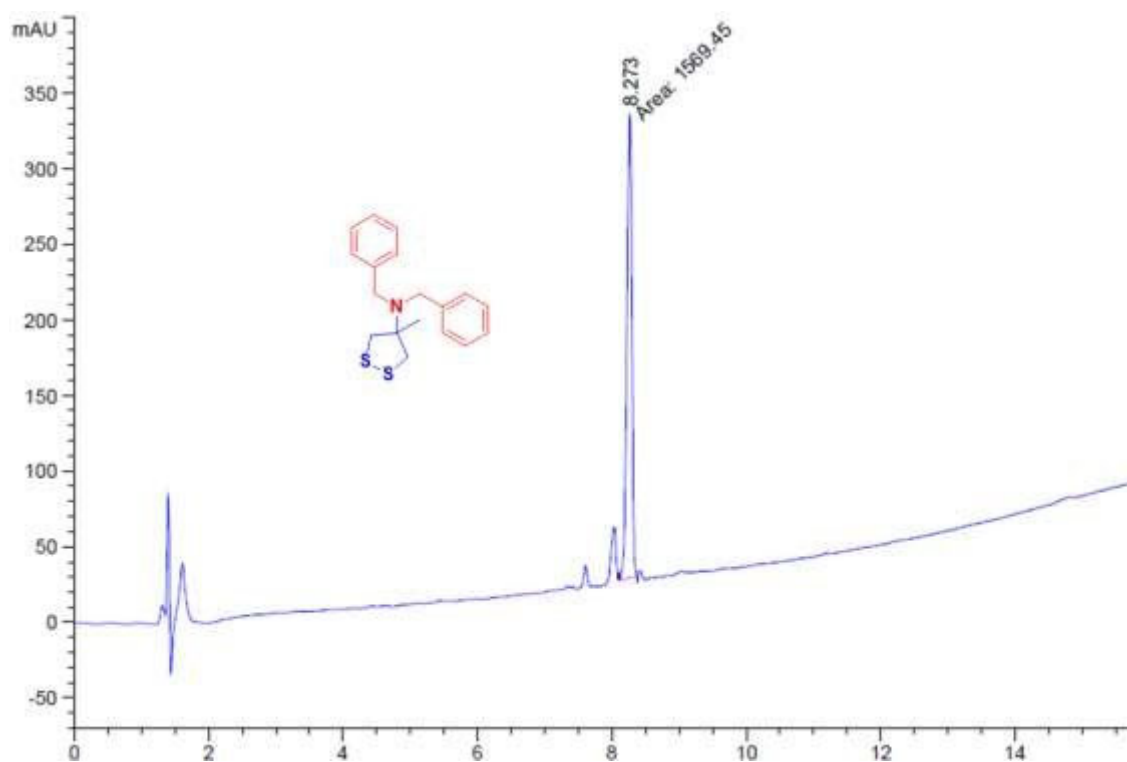

Figure S31: HPLC of Compound 1b<sup>ox</sup> (DMPDT<sup>ox</sup>)

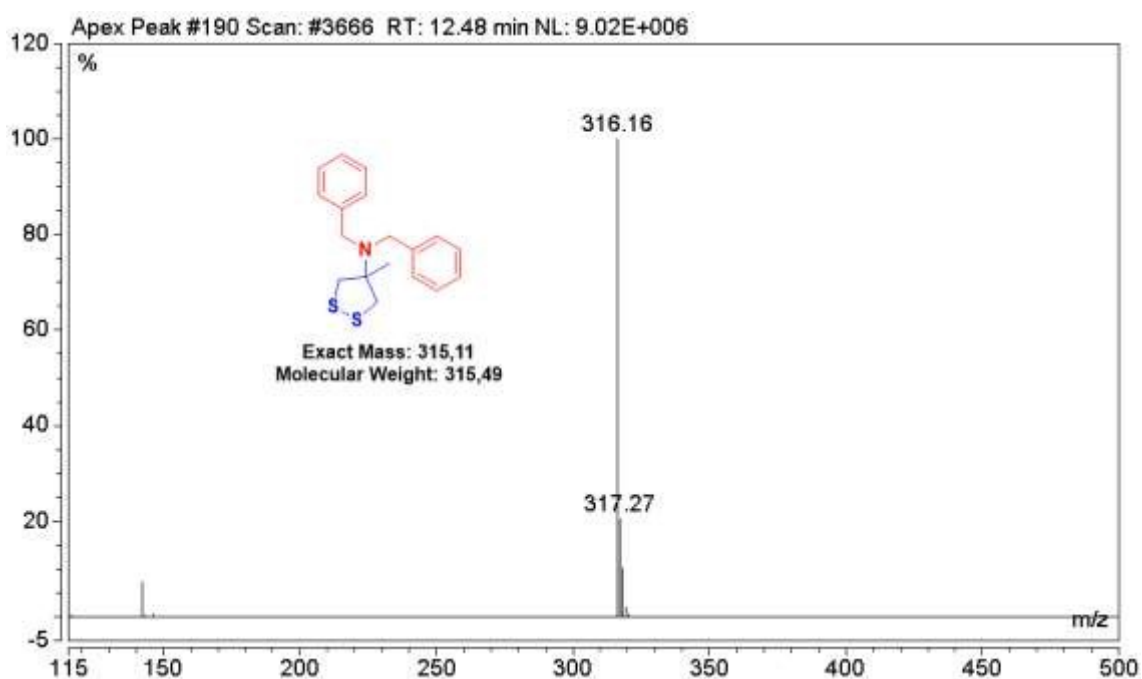

Figure S32: Mass of Compound 1b<sup>ox</sup> (DMPDT<sup>ox</sup>)

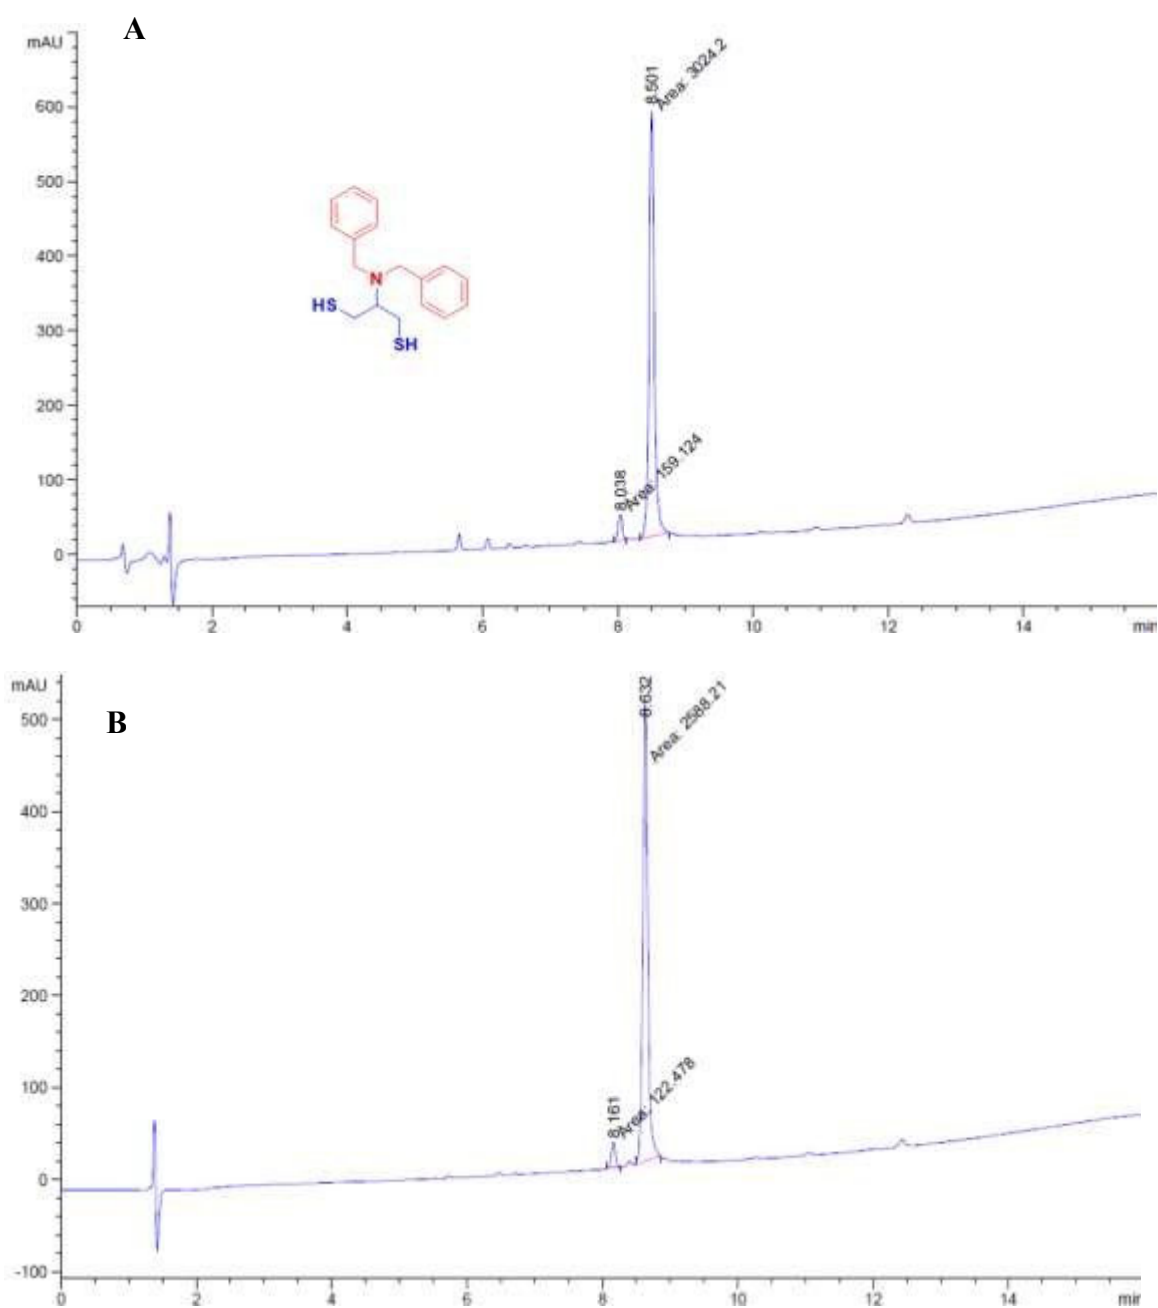

**Figure S33:** Stability test of DPDT in solid form. **(A)** freshly prepared; **(B)** after 60 days.

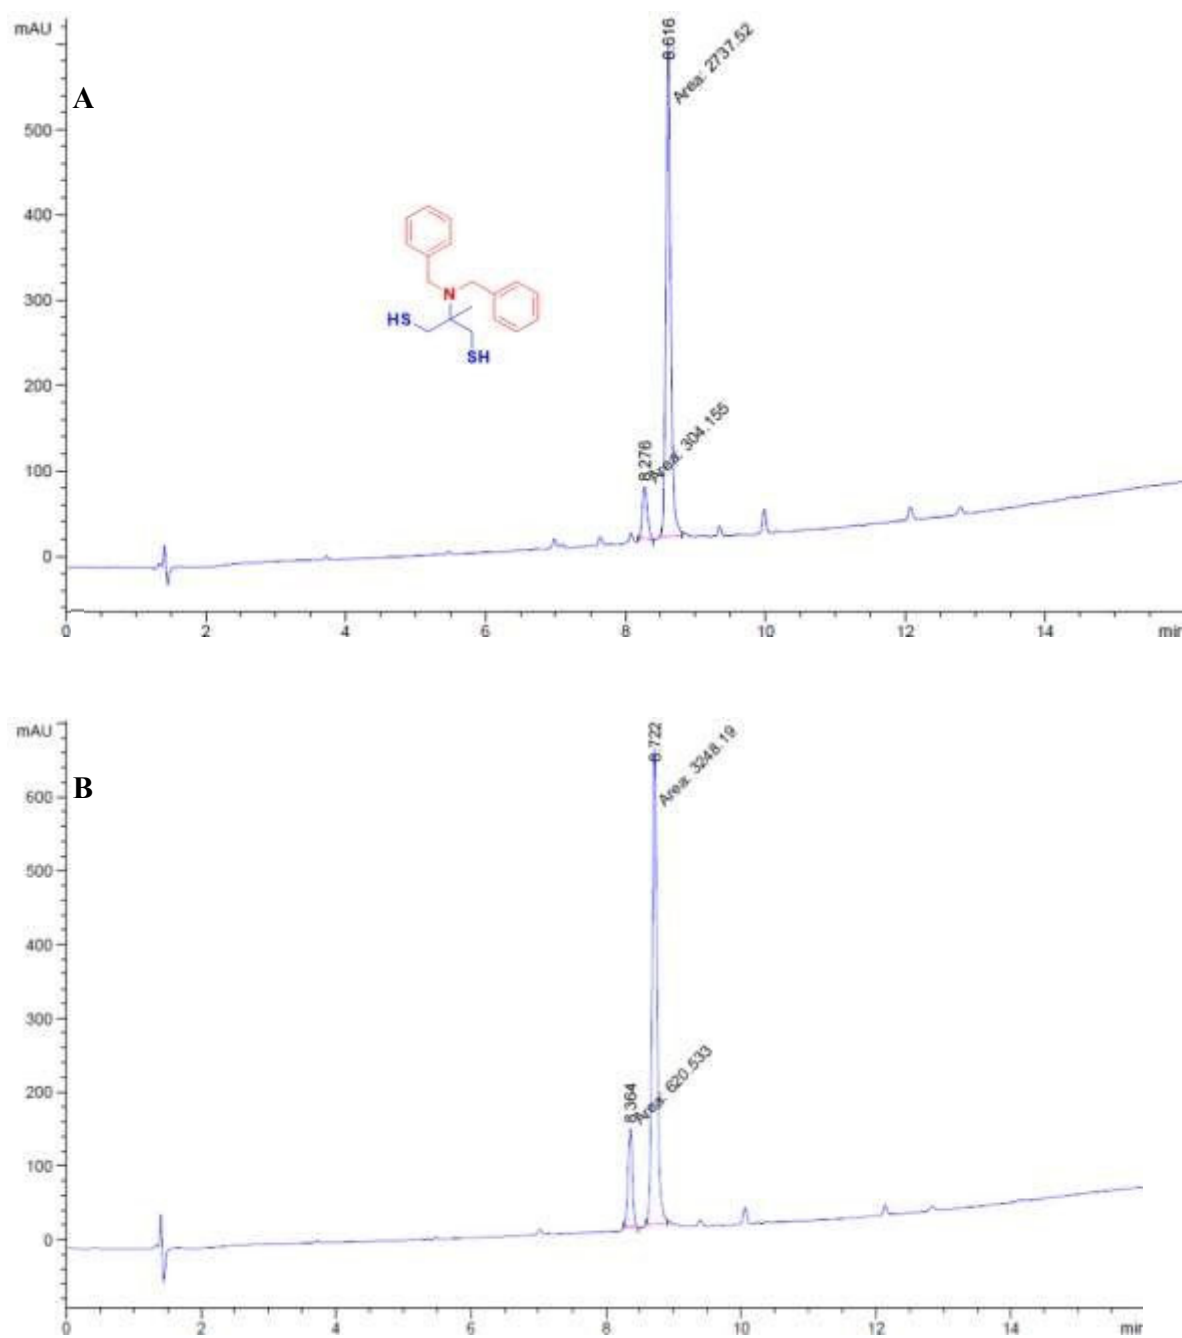

**Figure S34:** Stability test of DMPDT in solid form. **(A)** freshly prepared; **(B)** after 60 days.

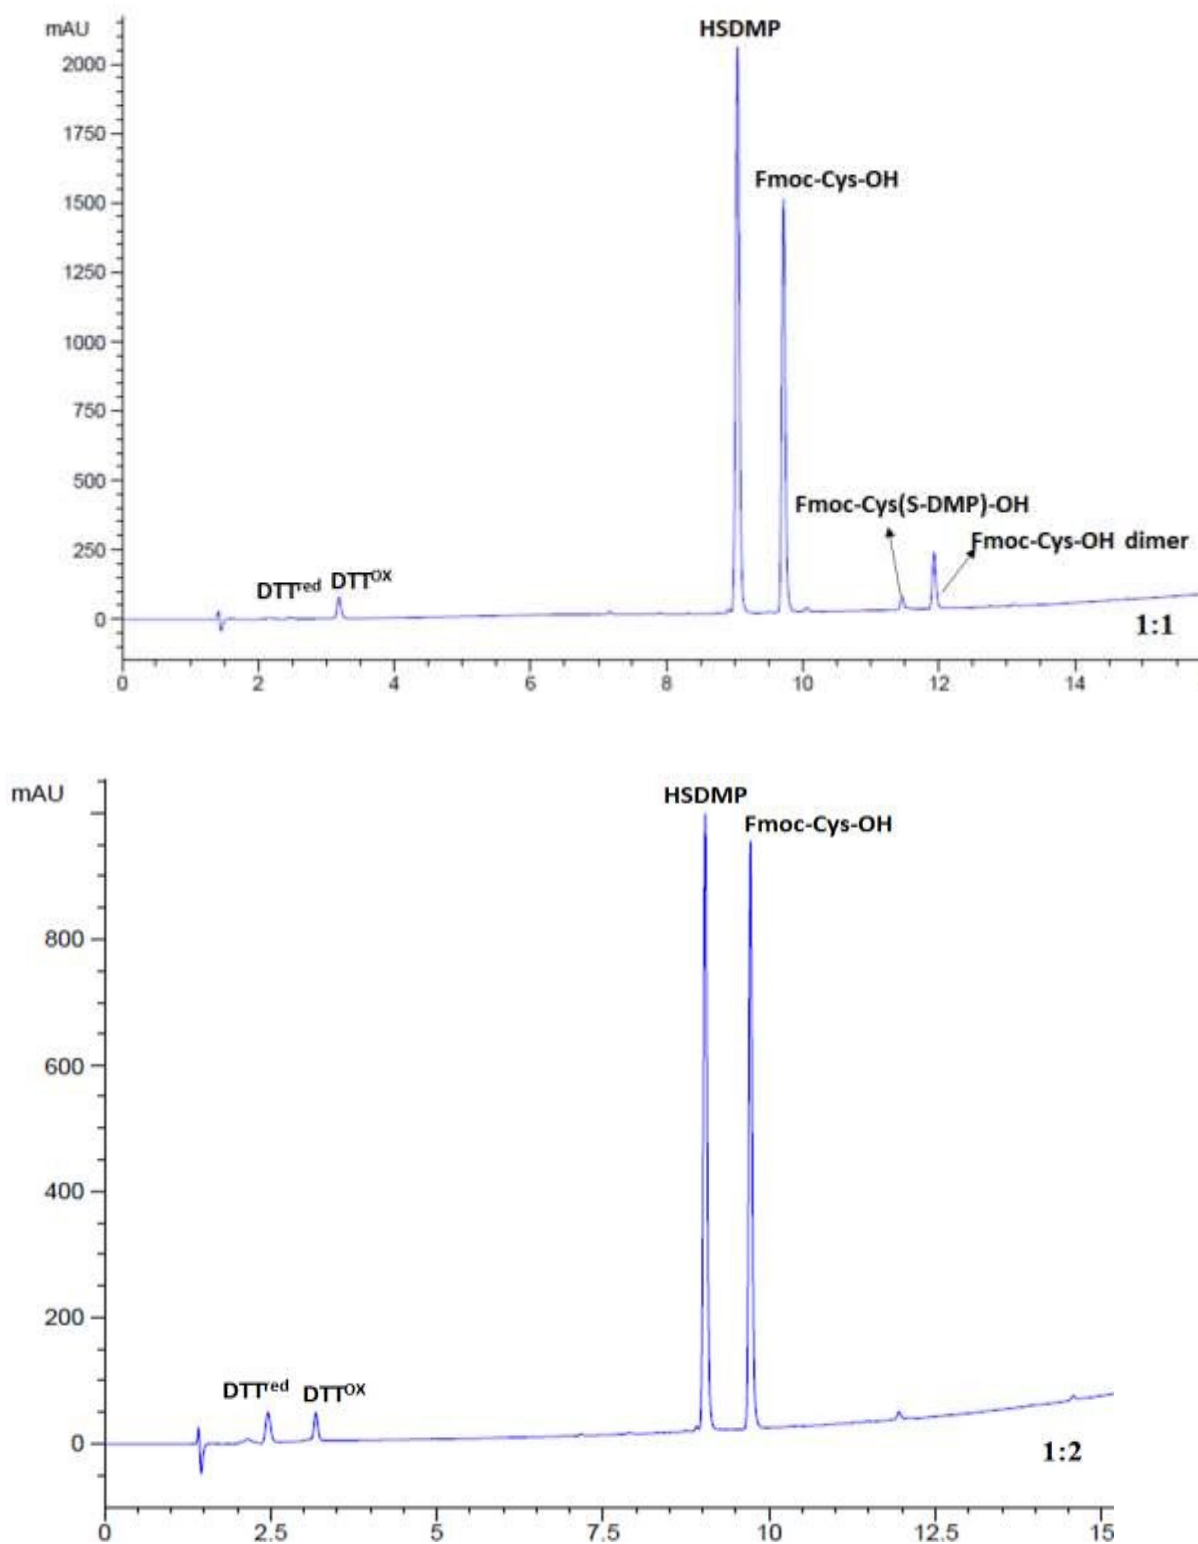

**Figure S35:** HPLC chromatogram of Fmoc-Cys(SDMP)-OH with DTT (1:1 and 1:2 ratio) with 2.5% DIEA and 2.5% water at 0 min.

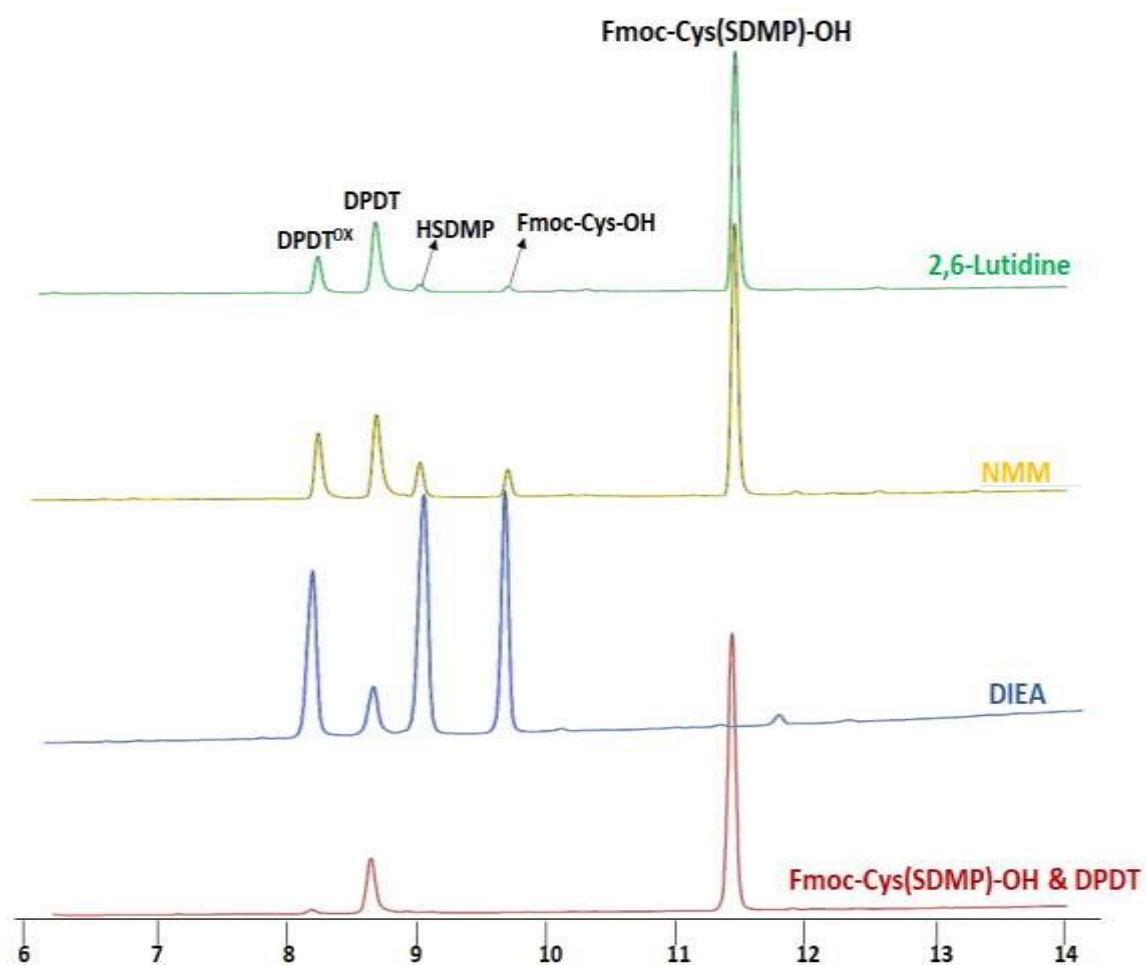

**Figure S36:** Effect of different bases in reduction of Fmoc-Cys(S-DMP)-OH using DPDT in ACN/base/H<sub>2</sub>O (95:2.5:2.5).

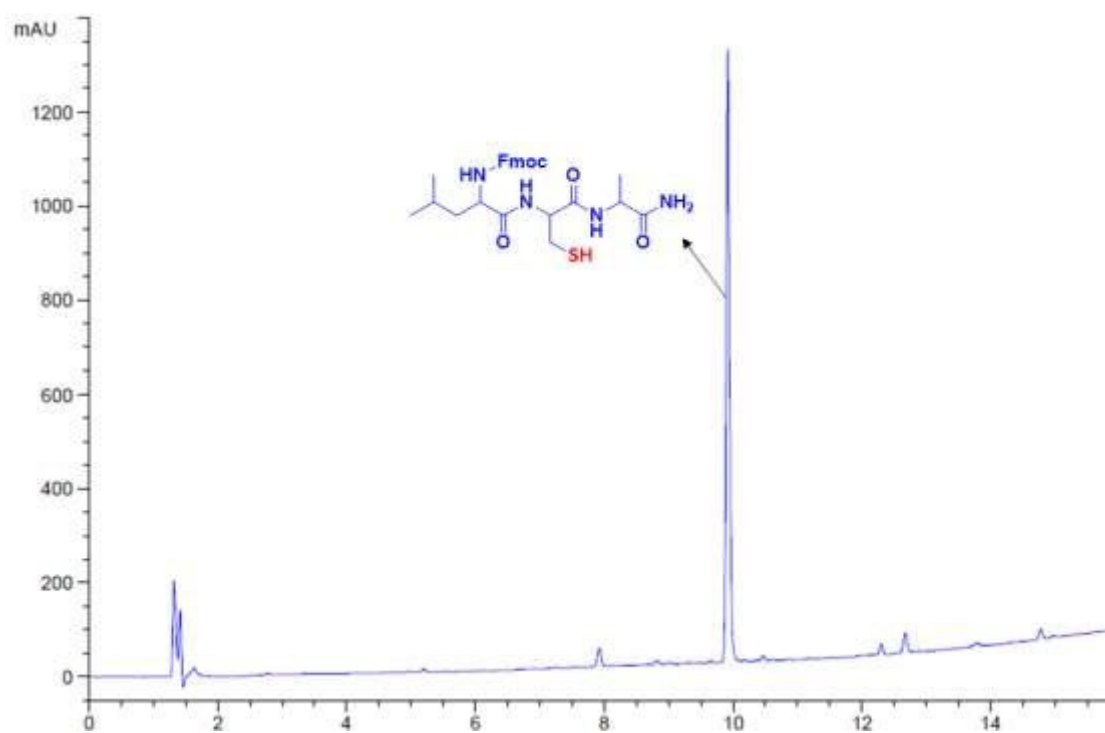

**Figure S37:** Fmoc-Ala-Cys(SIT)-Leu-NH-resin after treatment with DTT with 2.5% DIEA and 2.5% water in DMF.
